# Supplementary material for: High piezoelectricity induced by lattice distortion and domain realignment in Li2CO3-added lead-based ceramics
Source: Royal Society of Chemistry journal article supplement (doi:10.1039/d3ta05899a), 2023-01-01
Supplement: d3ta05899a1.pdf [file d3ta05899a1.pdf]

## Supplementary files

### **High piezoelectricity induced by lattice distortion and domain realignment in Li<sub>2</sub>CO<sub>3</sub>-added lead-based ceramics**

Hao Chen, Yining Xie, Jingwen Xi, Wanfeng Zhuang, Weiling Wang, Jie Xing, Hong  
Liu\*, Jianguo Zhu

College of Materials Science and Engineering, Sichuan University, Chengdu 610064,  
Sichuan, China

\*Corresponding author. E-mail address: liuh@scu.edu.cn (H. Liu)

### **Experimental procedure**

#### **Sample Preparation**

The ceramics were prepared by the traditional solid-state reaction route. The oxides including PbO (99%), NiO (98%), Nb<sub>2</sub>O<sub>5</sub> (99.5%), ZnO (99%), ZrO<sub>2</sub> (99%), TiO<sub>2</sub> (98%), Li<sub>2</sub>CO<sub>3</sub> (98%) were mixed in a ball mill jar with anhydrous ethanol for 12 h. The powders were dried and then calcined at 780 °C for 2 h. The calcined powders were milled again for 12 h. After drying, the powders were pressed into disks with a thickness of 1 mm and a diameter of 10 mm with 5 % Polyvinyl alcohol (PVA) as binder at 490 MPa. After burning at 550 °C for 4 h to remove the PVA, the disks were sintered at 1020 °C for 2 h. The ceramics were poled by 2 kV/mm DC voltage in 120 °C silicone oil.

#### **Characterization of microstructure and electrical properties**

The crystal and phase structures were analyzed by X-ray diffraction (XRD) (X'Pert Pro MPD instrument, B.V. PANalytical, Netherlands) and Raman

Spectrometer (LabRAM HR, HORIBA France). The surface morphology was observed by scanning electron microscopy (SEM, S-3400N, HITACHI, Japan). High-angle annular dark-field (STEM-HAADF) images were obtained using high-resolution scanning transmission electron microscopy (Spectra 300S/TEM, Thermo Fisher Scientific, USA). The piezoelectric constant ( $d_{33}$ ) was determined through a quasi-static piezoelectric constant meter (ZJ-3A, Institute of Acoustics, Chinese Academy of Sciences, China). The domain structures were observed by piezoelectric force microscopy (PFM) (Asylum Research, MFP-3D, USA). The dielectric properties were determined by impedance analyzers (HP 4294A, Agilent, USA). The ferroelectric  $P$ - $E$  hysteresis loops were measured by a ferroelectric tester (Radiant Technologies, Median, New York, USA).

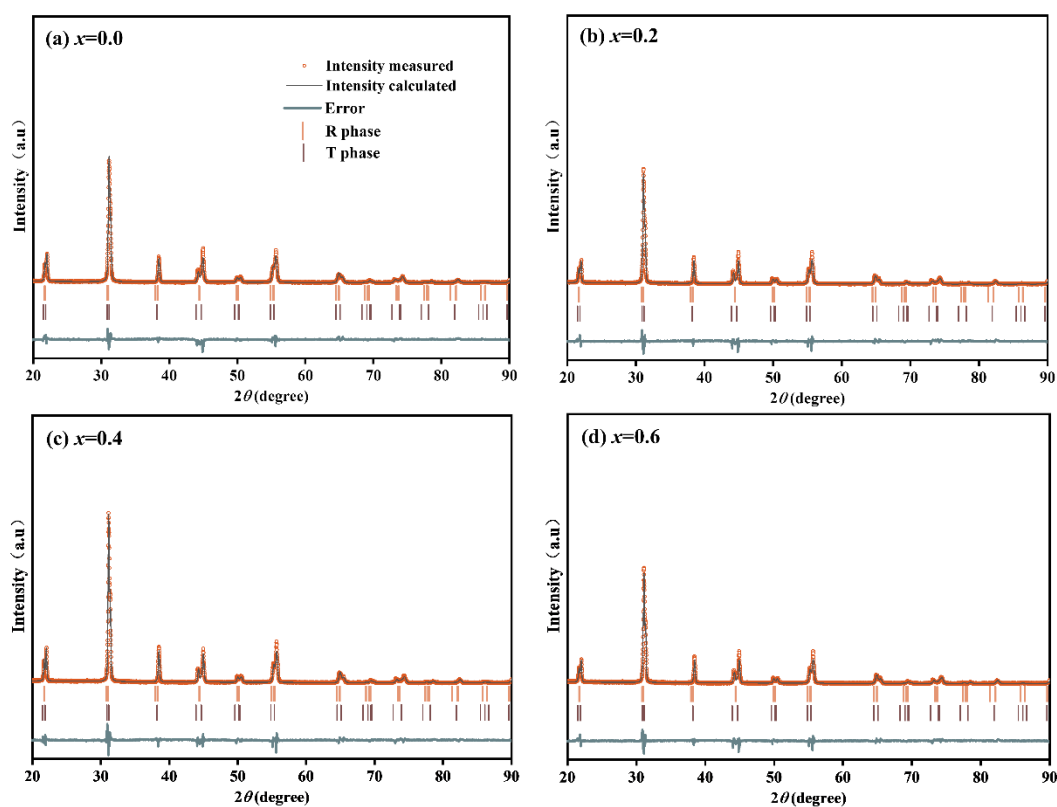

**Fig. S1** (a-d) Rietveld refinement of the XRD patterns of the  $x$ Li-PNNZNZT.

With increasing  $\text{Li}^+$  ion content, the six vibration modes tend to shift towards the high frequency, indicating that the structure of the  $[\text{BO}_6]$  octahedron is affected by the substitution of  $\text{Li}^+$  ions for  $\text{Pb}^{2+}$  ions, which is consistent with the Rietveld refined results in Table S1. Fig. S2 illustrates the Raman spectra of the  $x\text{Li}$ -PNNZNZT according to the following formula<sup>1</sup>:

$$\omega = \sqrt{\alpha/\mu} \quad (\text{S1})$$

where  $\mu$  is the reduced mass,  $\omega$  and  $\alpha$  represent the vibration mode frequency and the force constant, respectively. The substitution of  $\text{Pb}^{2+}$  with an ionic radius of 1.49 Å by small  $\text{Li}^+$  with an ionic radius of 1.24 Å results in a reduction of the cell volume and lattice shrinkage, which leads to an increase in the force constant of the  $[\text{BO}_6]$  octahedron, shifting the Raman frequency peaks to a higher band.

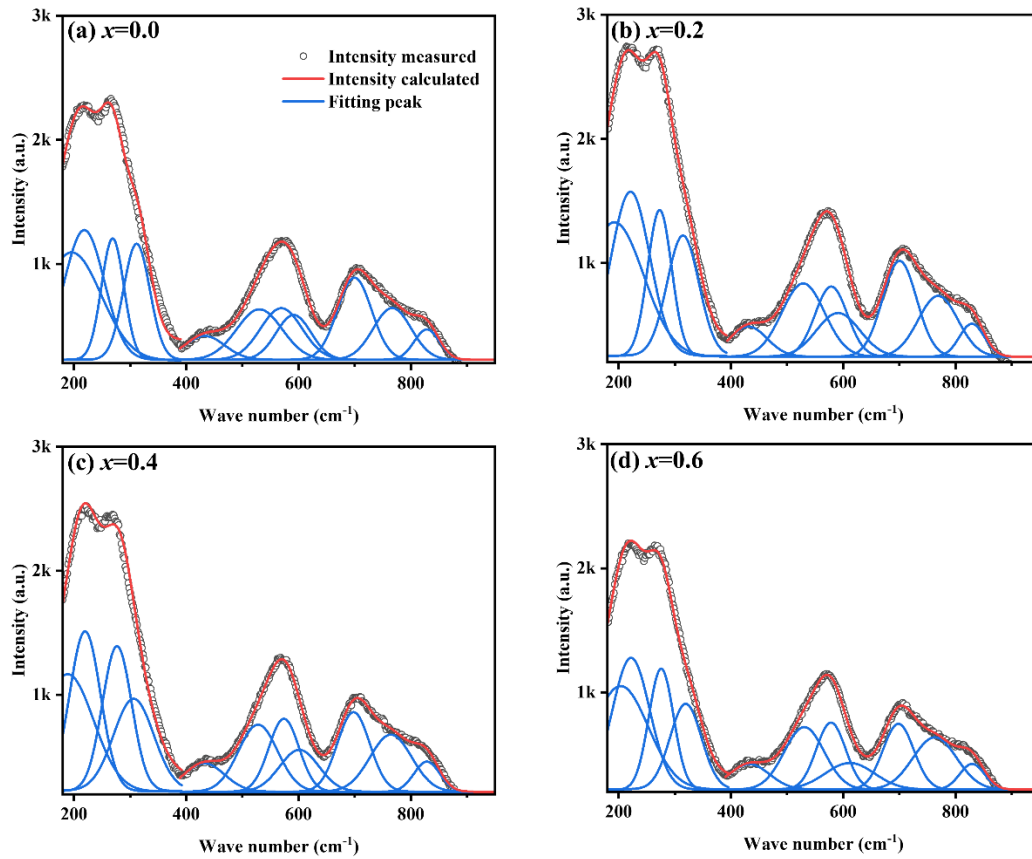

**Fig. S2** (a-d) Raman spectra of the  $x$ Li-PNNZNZT.

**Fig. S3a** shows the temperature-dependent dielectric constant ( $\epsilon_r$ ) at different frequencies. The permittivity peaks shift to higher temperatures with increasing frequency, which means the  $x$ Li-PNNZNZT are a typical relaxor ferroelectric. The  $\text{Li}^+$  ion doping can improve the Curie temperature ( $T_C$ ), which increases from 253 °C at  $x=0.0$  to 269 °C at  $x=0.4$  (**Fig. S3b**). For ferroelectric materials, the  $\epsilon_r$  needs to follow the Curie-Weiss law when the temperature is above  $T_C$ <sup>[2]</sup>:

$$\epsilon = C/(T-T_0) \quad (\text{S2})$$

where  $C$  and  $T_0$  represent the Curie-Weiss constant and the Curie-Weiss temperature, respectively, which can be obtained by linear fitting the data in **Fig. S3b**. The degree of deviation from the Curie-Weiss law is expressed as<sup>3, 4</sup>:

$$\Delta T_m = T_{cw} - T_m \quad (\text{S3})$$

where  $T_m$  is the temperature at maximum permittivity and  $T_{cw}$  denotes the temperature at which  $\epsilon_r$  of the ceramics begins to follow Curie-Weiss law. A lower  $T_0$  than  $T_C$  means that the ferroelectric-paraelectric phase transition of the ceramic is a first-order phase transition. In **Fig. S3d**, the  $C$  is between  $4.96 \times 10^5$  and  $5.77 \times 10^5$ , which means the samples are displacive-type ferroelectric. The  $P_s$  originates from the deviation of the atom from its equilibrium position in the paraelectric phase. To further investigate the relaxation feature, the degree of diffuseness ( $\gamma$ ) is calculated by the following equation<sup>5</sup>,

6:

$$\frac{1}{\epsilon_r} - \frac{1}{\epsilon_m} = \frac{(T-T_m)^\gamma}{C} \quad (\text{S4})$$

where  $\varepsilon_m$  denotes the dielectric constant at  $T_m$ . The relationship between  $\ln(1/\varepsilon_r - 1/\varepsilon_m)$  and  $\ln(T - T_m)$  is shown in Fig. S3c. In Fig. S3d and S3f, the  $\gamma$  (1.62~1.68) has the same trend with the  $\Delta T_m$  (9~14 °C), proving that Li<sup>+</sup>-ion doping does not significantly change the relaxation degree of the  $x$ Li-PNNZNZT.

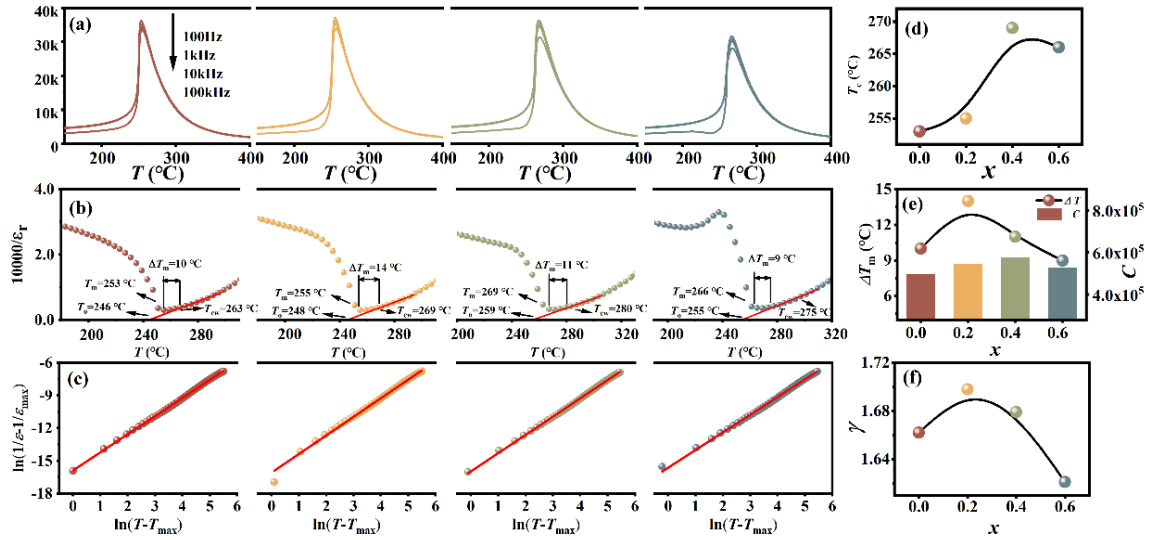

**Fig. S3** (a)  $\varepsilon_r - T$  (150—400 °C), (b)  $10000/\varepsilon_r - T$ , (c)  $\ln(1/\varepsilon_r - 1/\varepsilon_m) - \ln(T - T_m)$  curves of the  $x$ Li-PNNZNZT. (d)  $T_C$ , (e)  $\Delta T_m$  and  $C$ , (f)  $\gamma$  of the  $x$ Li-PNNZNZT.

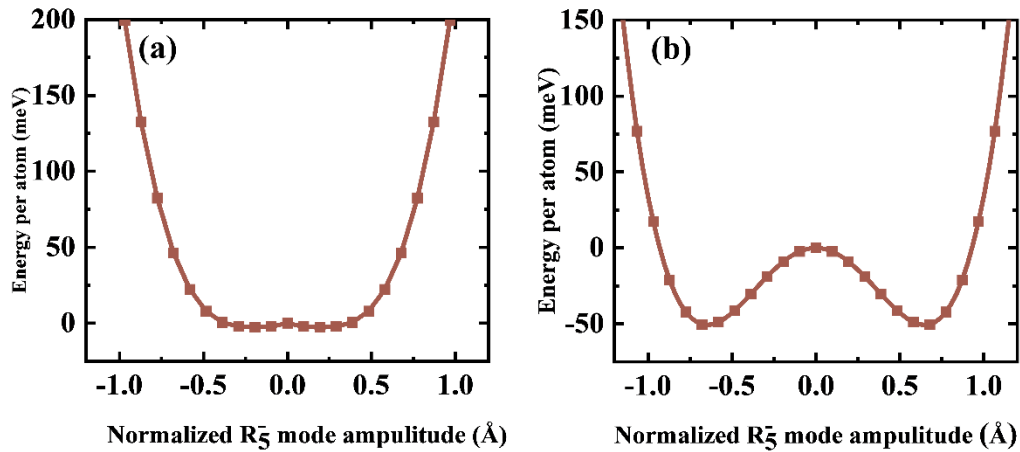

**Fig. S4** The normalized  $R_{5-}$  mode that forms the antiphase oxygen octahedral tilt of (a) 0Li-PNNZNZT and (b) 0.4Li-PNNZNZT by DFT.

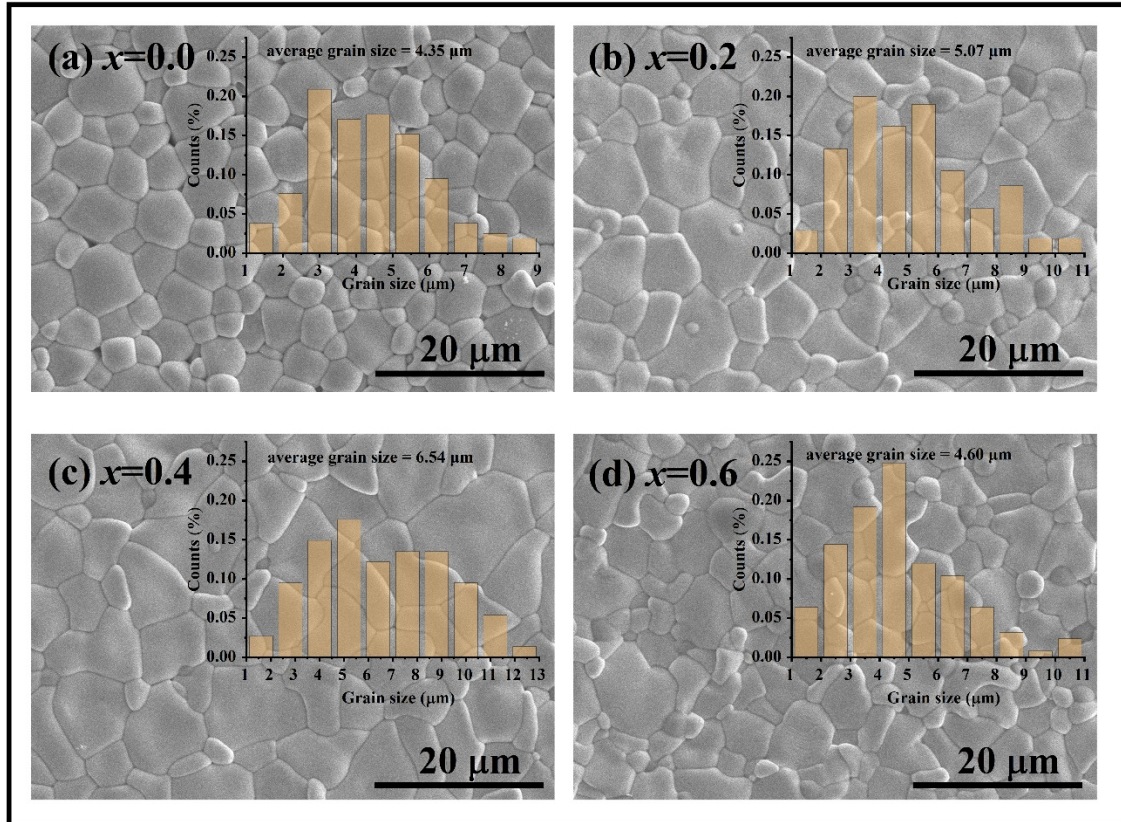

**Fig. S5** (a-d) Surface SEM images and the grain size distribution of the  $x$ Li-PNNZNZT

Note that the  $V_0^+$  is the switching voltage when DC voltage changes from negative to positive, and the  $V_0^-$  is the switching voltage when DC voltage changes from positive to negative values<sup>7</sup>. In Fig. S6a, the values of  $V_0^+$  of the ceramics with  $x=0.0, 0.4,$  and  $0.6$  are mostly around 3.5-4.5 V, 2.5-3.5 V, and 2.5-4.0 V, respectively. And in Fig. S6b, the values of  $V_0^-$  of the ceramics with  $x=0.0, 0.4, 0.6$  are mostly around (-3)-(-5) V, (-1)-(-4) V, (-2)-(-5) V, respectively. The  $V_0^+$  and  $V_0^-$  of the ceramics reach the minimum values at  $x=0.4$ .

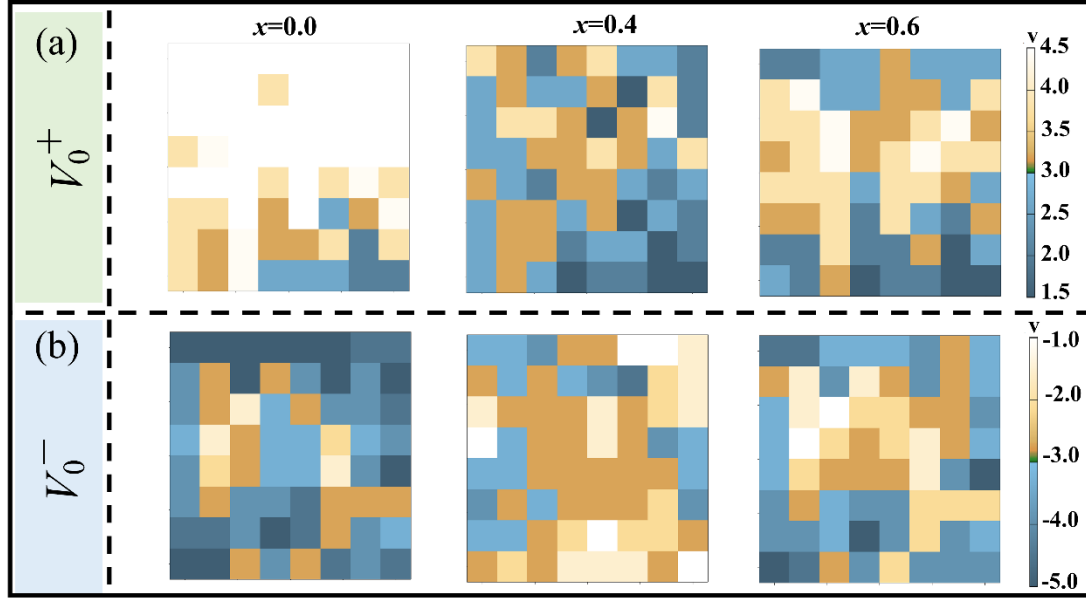

**Fig. S6** shows the maps of switching parameters of  $x\text{Li-PNNZNZT}$  ceramics obtained using SS-PFM: (a) Positive coercive bias  $V_0^+$ , (b) Negative coercive bias  $V_0^-$ .

**Fig. S7a** shows the polarization–electric field ( $P$ – $E$ ) loops for the ceramics measured at different temperatures (30 °C—150 °C). As shown in **Fig. S7d**, the  $x\text{Li-PNNZNZT}$  ceramics have a maximum value of 34.27  $\mu\text{C}/\text{cm}^2$  of remnant polarization ( $P_r$ ) and a minimum value of 8.96 kV/mm of coercive field ( $E_c$ ).

As shown in **Fig. S7b**, the values of  $P_r$  and  $P_s$  of the ceramics gradually decrease with the increase in temperature. To further understand the law of domain motion, the relation between the back-switched polarization ( $P_{bc}$ ) ( $P_{bc}=P_s-P_r$ ) and the activation energy for domain wall movement ( $E_a$ ) can be described as the following formula:<sup>7</sup>

$$P_{bc}=P_0\exp(-E_a/k_B T) \quad (\text{S5})$$

where  $P_0$  denotes a fitting constant;  $k_B$  and  $T$  express the Boltzmann constant and the absolute temperature, respectively. According to **equation S5**, the  $\ln(P_{bc})$ – $1000/T$  curves of the ceramics are exhibited in **Fig. S7c**, and the value of  $E_a$  is obtained by the fitting. As observed in **Fig. S7f**, the  $E_a$  decreases from 0.0939 eV to 0.0456 eV with  $x$

increasing from 0.0 to 0.4.

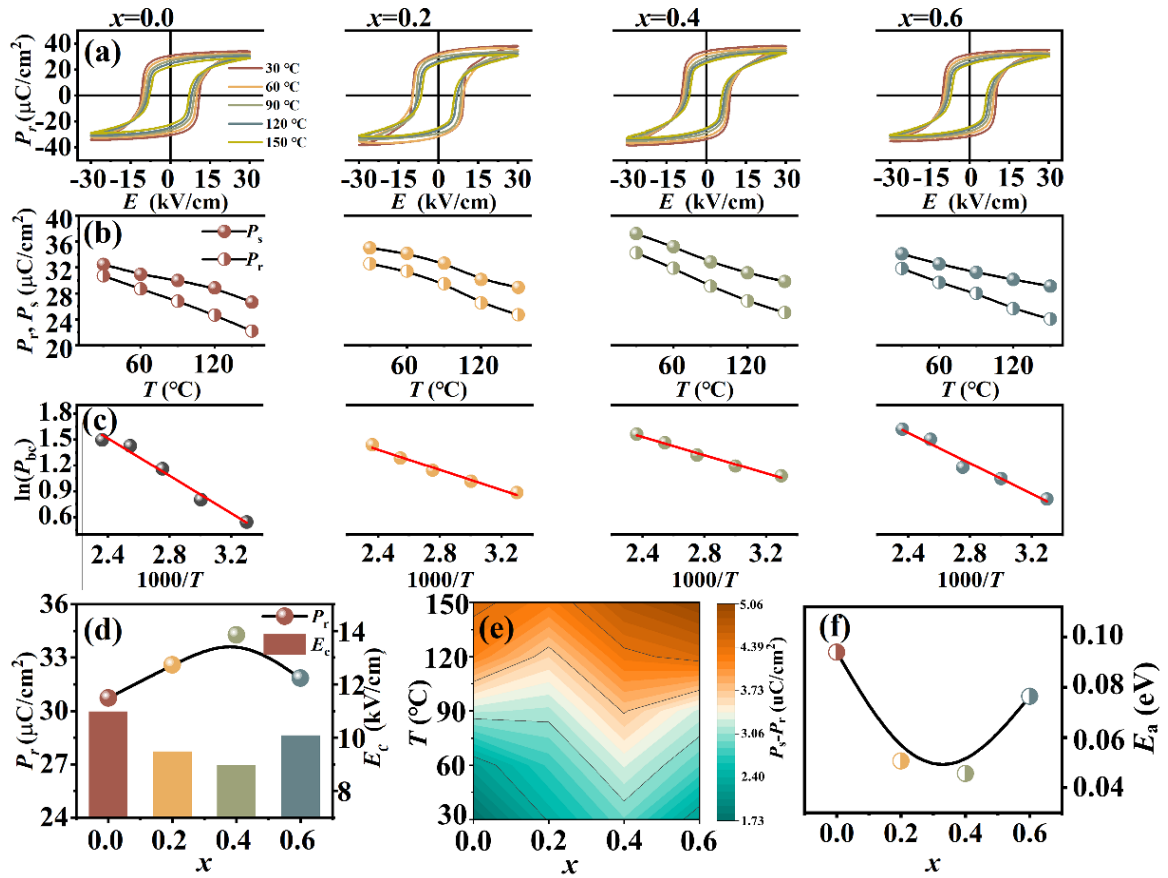

**Fig. S7** (a)  $P$ - $E$  loops, (b)  $P_r$ - $T$ ,  $P_s$ - $T$ , (c)  $\ln(P_{bc})$ - $1000/T$  curves of the  $x$ Li-PNNZNZT ceramics. (d)  $P_r$  and  $E_c$  (30 °C), (e)  $P_s-P_r$  (30-150 °C), (f)  $E_a$  as a function of  $x$ .



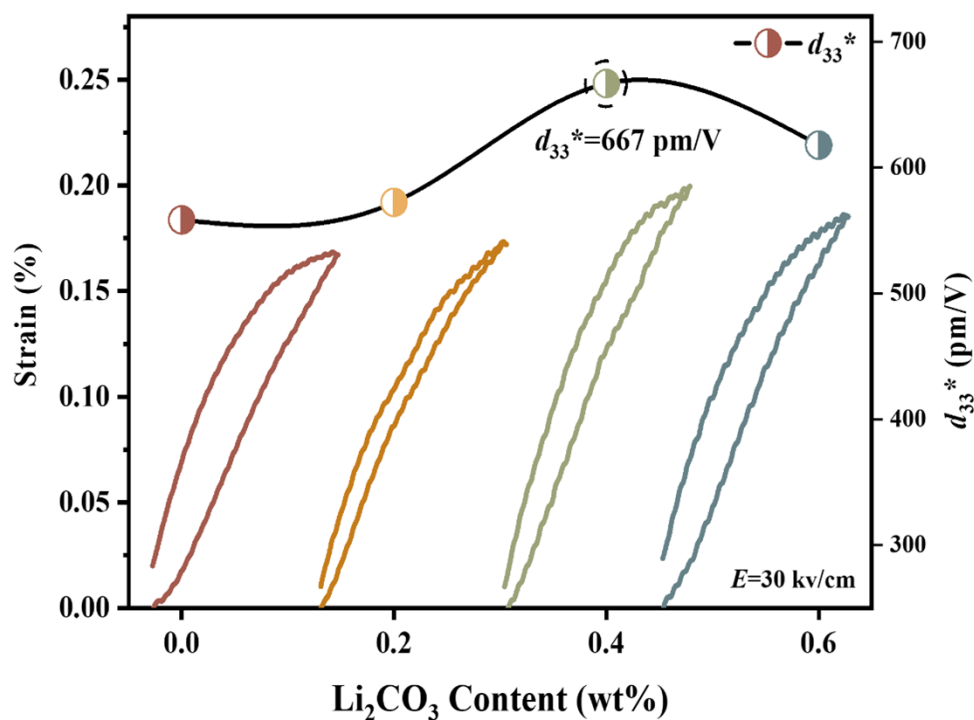

**Fig. S8** The unipolar strain of  $x\text{Li-PNNZNZT}$  ceramics.

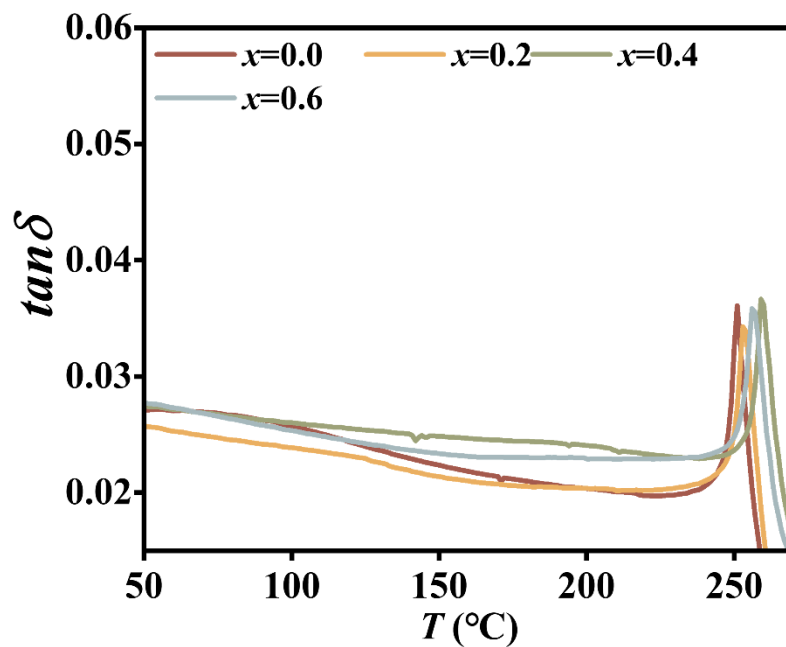

**Fig. S9** Temperature dependence of the dielectric loss for the  $x\text{Li-PNNZNZT}$  ceramics at 10 kHz.

**Table S1** Crystal structure parameters of the  $x$ Li-PNNZNZT derived from the Rietveld structure refinement program.

|                                       | <b><math>x=0</math></b> |         | <b><math>x=0.2</math></b> |         | <b><math>x=0.4</math></b> |         | <b><math>x=0.6</math></b> |         |
|---------------------------------------|-------------------------|---------|---------------------------|---------|---------------------------|---------|---------------------------|---------|
| <b><math>R_w</math> (%)</b>           | 7.66                    |         | 8.06                      |         | 7.47                      |         | 7.42                      |         |
| <b><math>Sig</math></b>               | 1.96                    |         | 1.97                      |         | 1.99                      |         | 1.92                      |         |
| <b>symmetry</b>                       | R phase                 | T phase | R phase                   | T phase | R phase                   | T phase | R phase                   | T phase |
| <b>proportion</b>                     | 21.01                   | 78.99   | 16.15                     | 83.85   | 15.52                     | 84.48   | 10.70                     | 89.30   |
| <b>space group</b>                    | R3m                     | P4mm    | R3m                       | P4mm    | R3m                       | P4mm    | R3m                       | P4mm    |
| <b><math>a</math> (Å)</b>             | 4.0540                  | 4.0297  | 4.0538                    | 4.0276  | 4.0533                    | 4.0274  | 4.0518                    | 4.0269  |
| <b><math>b</math> (Å)</b>             | 4.0540                  | 4.0297  | 4.0538                    | 4.0276  | 4.0533                    | 4.0274  | 4.0518                    | 4.0269  |
| <b><math>c</math> (Å)</b>             | 4.0540                  | 4.0890  | 4.0538                    | 4.0888  | 4.0533                    | 4.0887  | 4.0518                    | 4.0886  |
| <b><math>\alpha</math> (deg)</b>      | 89.7036                 | 90.0000 | 89.6471                   | 90.0000 | 89.7396                   | 90.0000 | 89.7576                   | 90.0000 |
| <b><math>V</math> (Å<sup>3</sup>)</b> | 66.62                   | 66.40   | 66.61                     | 66.33   | 66.59                     | 66.31   | 66.52                     | 66.31   |
| <b><math>c/a</math></b>               | 1.0000                  | 1.0147  | 1.0000                    | 1.0152  | 1.0000                    | 1.0153  | 1.0000                    | 1.0153  |

**Table S2** Dielectric loss ( $\tan\delta$ ) of the  $x$ Li-PNNZNZT ceramics measured at different temperatures and at 10 kHz.

| $x$ | $\tan\delta@$<br>RT | $\tan\delta@$<br>50 °C | $\tan\delta@$<br>100 °C | $\tan\delta@$<br>150 °C | $\tan\delta@$<br>200 °C | $\tan\delta@$<br>250 °C |
|-----|---------------------|------------------------|-------------------------|-------------------------|-------------------------|-------------------------|
| 0.0 | 0.0253              | 0.0271                 | 0.0257                  | 0.0224                  | 0.0204                  | 0.0325                  |
| 0.2 | 0.0254              | 0.0257                 | 0.0239                  | 0.0214                  | 0.0204                  | 0.0251                  |
| 0.4 | 0.0261              | 0.0274                 | 0.0260                  | 0.0249                  | 0.0241                  | 0.0237                  |
| 0.6 | 0.0264              | 0.0277                 | 0.0253                  | 0.0234                  | 0.0229                  | 0.0248                  |

**Table S3** The equation and diffusive coefficient of the  $x$ Li-PNNZNZT fitted by the modified Curie–Weiss law.

|         | The fitting equation  | $r$   |
|---------|-----------------------|-------|
| $x=0.0$ | $y=1.66212x-15.88152$ | 1.662 |
| $x=0.2$ | $y=1.69843x-16.08185$ | 1.698 |
| $x=0.4$ | $y=1.67948x-15.97479$ | 1.679 |
| $x=0.6$ | $y=1.62074x-15.63058$ | 1.621 |

1. S.-H. Lee, H. M. Jang, H. H. Sung and H. Yi, 2002, *Appl. Phys. Lett.*, **81**, 2439–2441.
2. R. Nie, Q. Zhang, Y. Yue, H. Liu, Y. Chen, Q. Chen, J. Zhu, P. Yu and D. Xiao, *J. Appl. Phys.*, 2016, **119**, 124111.
3. H.-W. Zhu, D.-Y. Zheng, X.-J. Wang, L. Yang, C. Fang and Z.-H. Peng, *J. Mater. Sci.: Mater. Electron.*, 2018, **29**, 16864–16871.
4. H. Chen, J. Xing, J. Xi, T. Pu, H. Liu and J. Zhu, *J. Am. Ceram. Soc.*, 2021, **104**, 6266–6276.
5. B. Wu, C. Zhao, Y. Huang, J. Yin, W. Wu and J. Wu, *ACS Appl. Mater. Interfaces*, 2020, **12**, 25050–25057.
6. Y. Yue, Q. Zhang, R. Nie, P. Yu, Q. Chen, H. Liu, J. Zhu, D. Xiao and H. Song, *Mater. Res. Bull.*, 2017, **92**, 123–128.

7. B. Ma, Z. Hu, S. Liu, M. Narayanan and U. Balachandran, *Appl. Phys. Lett.*, 2013, **102**,072901.
